# Supplementary material for: Vesiculation of Red Blood Cells in the Blood Bank: A Multi-Omics Approach towards Identification of Causes and Consequences
Source: MDPI journal article supplement (doi:10.3390/proteomes8020006), 2020-03-31
Supplement: s1 [file s1]

## Supplemental Data

Table 1: Protein groups of the RBC-derived microvesicles.

Proteins from all samples were identified by a single MaxQuant analysis, ensuring that peptides are mapped to proteins consistently. Proteins were identified at 1 % FDR cutoff and proteins identified by a single peptide are shown in grey colour.
